# Supplementary material for: Confined naked gold nanoparticles in ionic liquid films
Source: Royal Society of Chemistry journal article supplement (doi:10.1039/c7nr06167f), 2017-01-01
Supplement: c7nr06167f1.pdf [file c7nr06167f1.pdf]

## Supporting Information

### Confined naked gold nanoparticles in ionic liquid films

Luciane Calabria,<sup>a</sup> Jesum A. Fernandes,<sup>\*b</sup> Pedro Migowski,<sup>c</sup> Fabiano Bernardi,<sup>d</sup> Daniel L. Baptista,<sup>d</sup> Rafael Leal,<sup>a</sup> Thomas Grehl<sup>e</sup> and Jairton Dupont<sup>\*a,b</sup>

<sup>a</sup>Institute of Chemistry–UFRGS–Av. Bento Gonçalves, 9500, Porto Alegre, 91501-970, RS, Brazil.

E-mail: jairton.dupont@ufrgs.br

<sup>b</sup>GSK Carbon Neutral Laboratories for Sustainable Chemistry–NG8 2GT, University of Nottingham, UK.

E-mail: jesum.alvesfernandes@nottingham.ac.uk

<sup>c</sup>Institute of Chemistry–UFSC– Campus Reitor João David Ferreira Lima, Florianópolis, 88040-900, SC, Brazil.

<sup>d</sup>Institute of Physics–UFRGS–Av. Bento Gonçalves, 9500, Porto Alegre, 91501-970, RS, Brazil.

<sup>e</sup>ION-TOF GmbH, Heisenbergstr. 15, D-48149 Münster, Germany.

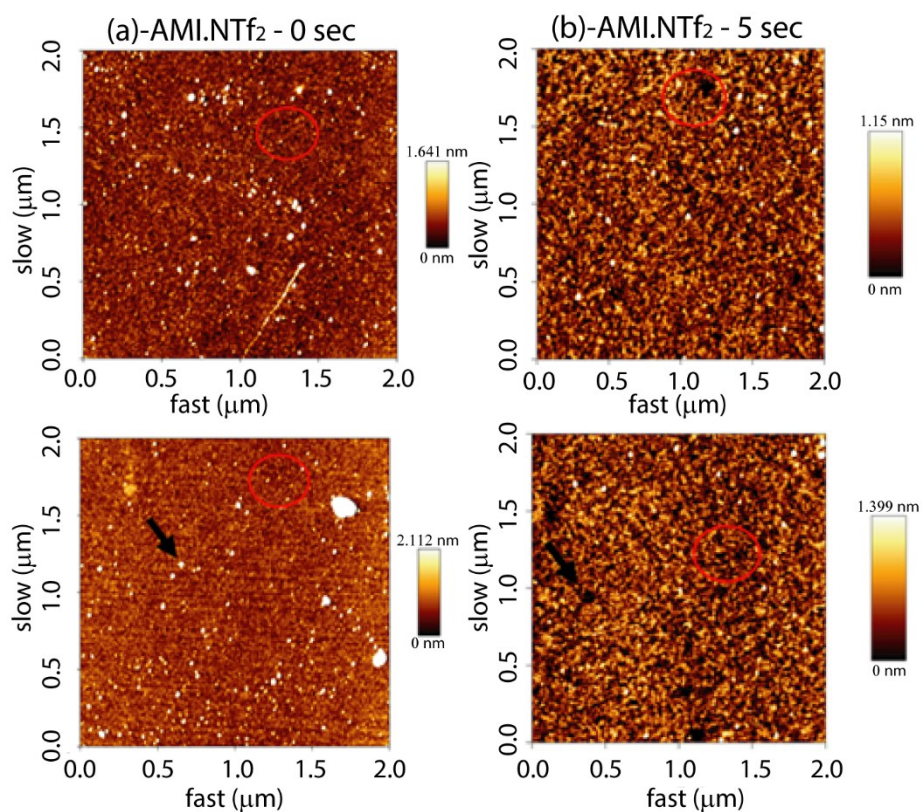

**Figure S1.** AFM measurements of IL/Si support (a) without NPs and (b) with Au NPs.

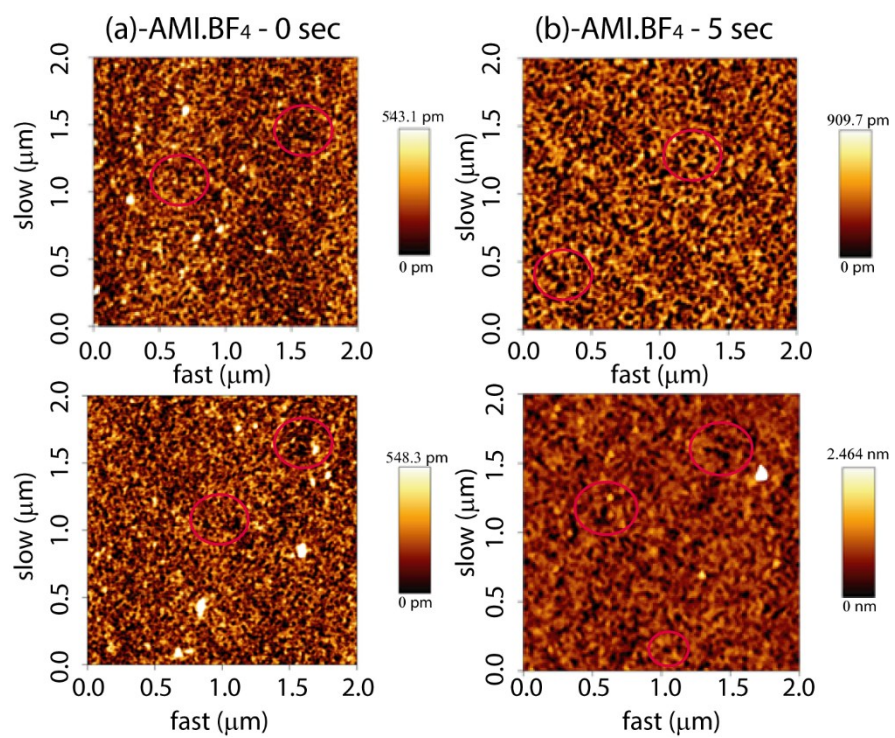

**Figure S2.** AFM measurements of IL/Si support (a) without NPs and (b) with Au NPs.

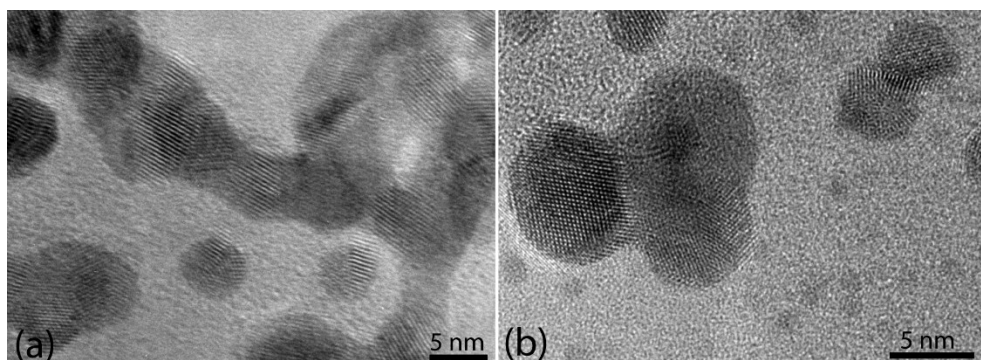

**Figure S3.** TEM images of Au NPs deposited for 10 s in AMIm.NTf<sub>2</sub> (a) and AMIm.BF<sub>4</sub> (b).

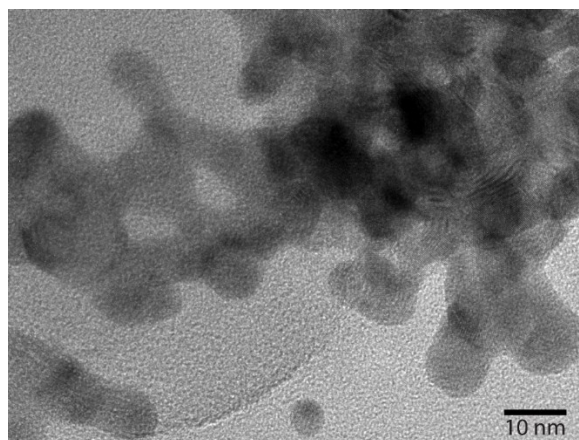

**Figure S4.** TEM images of Au NPs deposited for 5 s in 1-methyl-3-n-octylimidazolium bis((trifluoromethyl) sulfonyl) (OAI.NTf<sub>2</sub>).

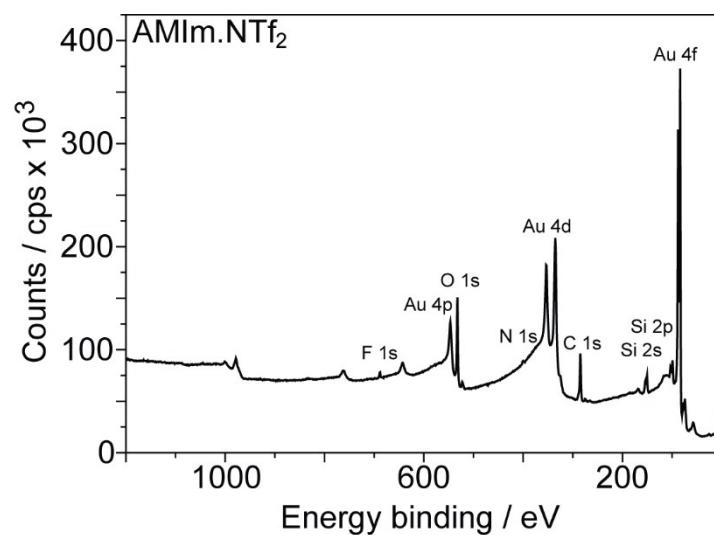

**Figure S5.** XPS long scan of Au NPs deposited on IL/Si support (AMIm.NTf<sub>2</sub>).

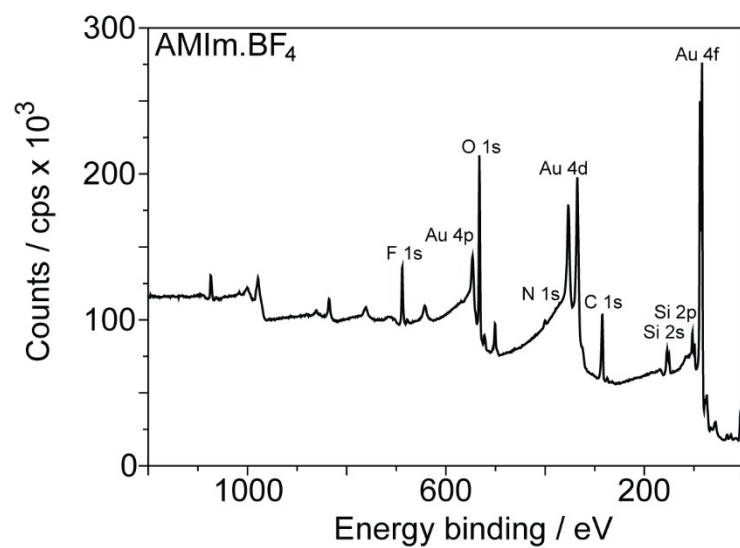

**Figure S6.** XPS long scan of Au NPs deposited on IL/Si support (AMIm.BF<sub>4</sub>).

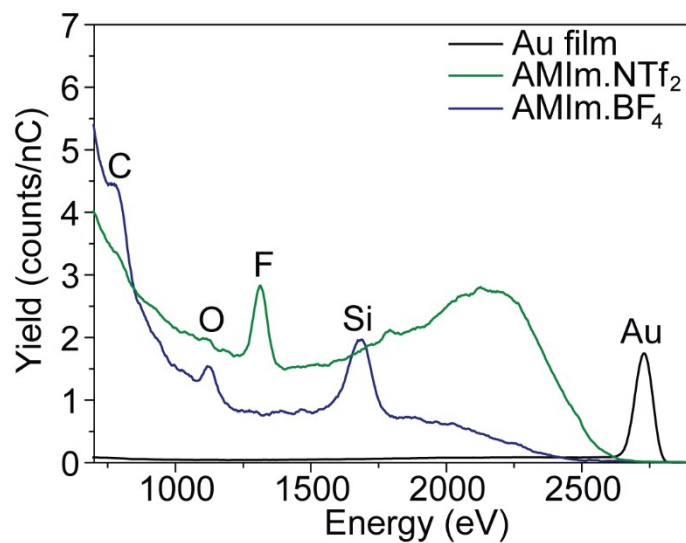

**Figure S7.** HS-LEIS spectra comparison of the samples synthesized and measured with a 3 keV 4He<sup>+</sup> ion beam. The Au film was scaled by a factor of 0.03.
